# Supplementary material for: Adsorption of Cd(ii) from aqueous solution by biogenic selenium nanoparticles
Source: Royal Society of Chemistry journal article supplement (doi:10.1039/c5ra26367k), 2016-01-01
Supplement: c5ra26367k1.pdf [file c5ra26367k1.pdf]

1

## Supporting Information

2

### 3        **Adsorption of Cd (II) from aqueous solution by biogenic** 4        **selenium nanoparticles**

5        Fanghui Yuan, Chao Song, Xuefei Sun, Linrui Tan, Yunkun Wang, Shuguang  
6        Wang\*

6        Shandong Key Laboratory of Water Pollution Control and Resource Reuse, School of  
7        Environmental Science and Engineering, Shandong University, Jinan 250100, China

8

9        Corresponding author:

10       E-mail: [wsg@sdu.edu.cn](mailto:wsg@sdu.edu.cn); Tel: +86 531 88365919; Fax: +86 531 88364513

11

12 UV-vis spectrophotometer (Beijing Purkinje General Instrument Co., Ltd., China  
13 TU-1901) was used to collect the adsorption spectra of the BioSeNPs at a wavelength  
14 range of 200-800 nm at an interval of 1 nm. As shown in Fig.S3, the UV-visible  
15 spectrometric analysis the absorbance peak of BioSeNPs was appeared at 280 nm (the  
16 absorption peak of protein)<sup>1</sup>, it is fit with previous researches that protein play a key  
17 role in the  $\text{SeO}_3^{2-}$  reduction<sup>2</sup>. Another study had investigated the presence of  
18 extracellular polymeric substances (EPS) on BioSeNPs and examined the role of EPS  
19 in capping the extracellularly available BioSeNPs<sup>3</sup>. The presence of EPS or protein  
20 reasonable explains the existence of C, O, N when in XPS analysis.

21

22

## Figure Captions

23 **Fig.S1** SEM image of BioSeNPs

24 **Fig.S2** The general scan spectrum of (a) BioSeNPs and (b) Cd-loaded BioSeNPs

25 **Fig.S3** UV-vis spectrum of BioSeNPs

26 **Fig.S4** N 1s spectra of (a) BioSeNPs and (b) Cd-loaded BioSeNPs

27

28

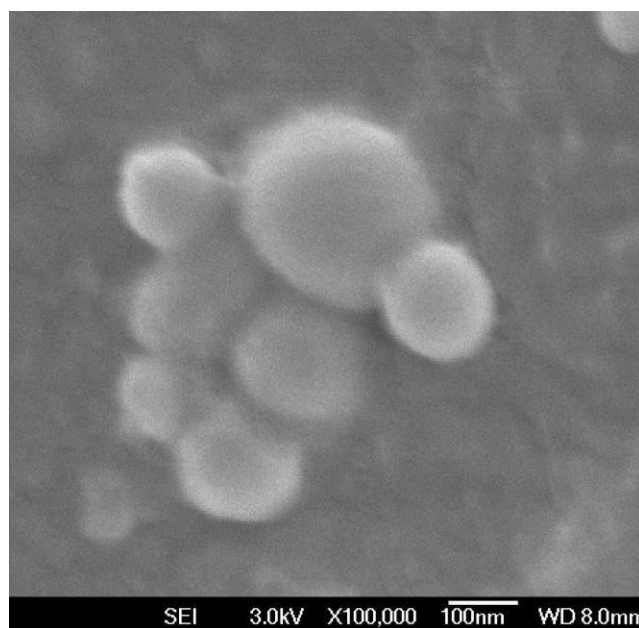

29

30

**Fig.S1**

31

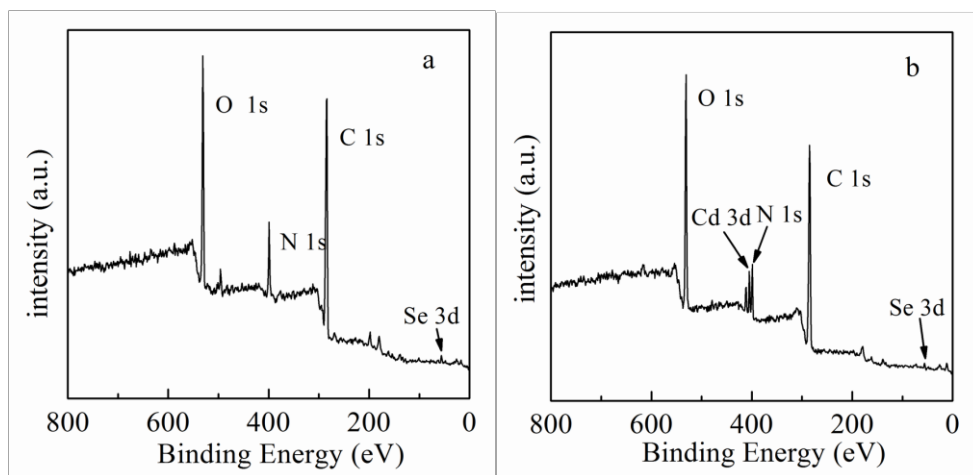

32

33

**Fig.S2**

34

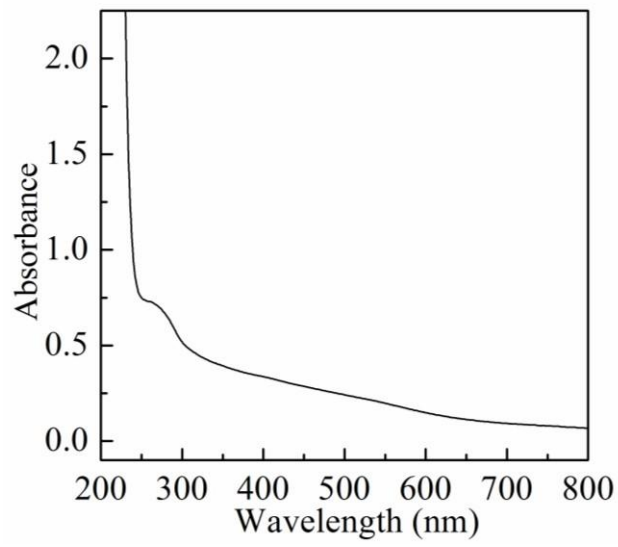

35

36

**Fig.S3**

37

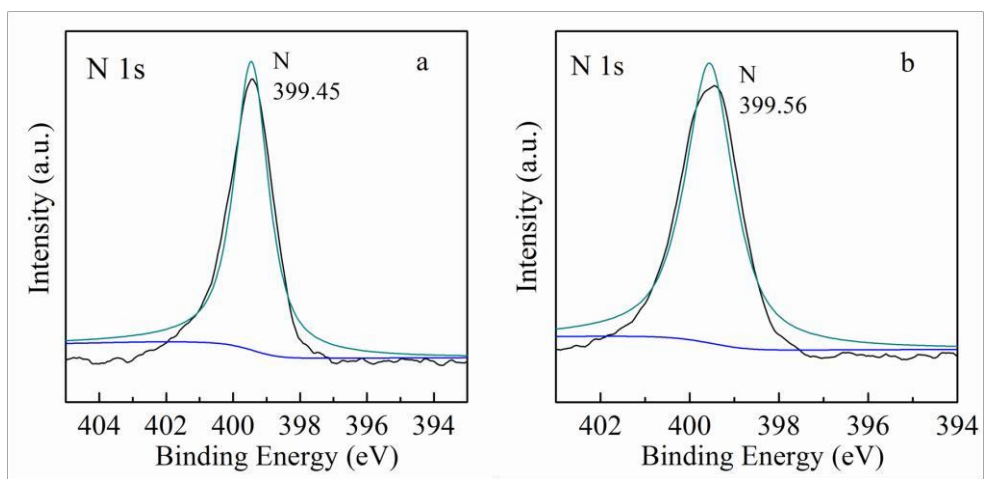

38

39

**Fig.S4**

40

- 41 1. T. Wang, L. Yang, B. Zhang and J. Liu, *Colloids and Surfaces B: Biointerfaces*,  
42 2010, 80, 94-102.
- 43 2. W. Zhang, Z. Chen, H. Liu, L. Zhang, P. Gao and D. Li, *Colloids and Surfaces*  
44 *B: Biointerfaces*, 2011, 88, 196-201.
- 45 3. R. Jain, N. Jordan, D. Schild, E. D. van Hullebusch, S. Weiss, C. Franzen, F.  
46 Farges, R. Hübner and P. N. L. Lens, *Chemical Engineering Journal*, 2015,  
47 260, 855-863.
- 48
- 49
